# Supplementary material for: Catalytic conversion of high S-lignin to a sustainable tri-epoxide polymer precursor
Source: Royal Society of Chemistry journal article supplement (doi:10.1039/d2gc01278b), 2022-01-01
Supplement: d2gc01278b1.pdf [file d2gc01278b1.pdf]

## Supporting Information

for

# Catalytic Conversion of High S-Lignin to a Sustainable Tri-epoxide Polymer Precursor

Baoyuan Liu, Melissa Sanchez, Julianne Truong, Peter C. Ford, and Mahdi M. Abu-Omar

Department of Chemistry and Biochemistry, University of California, Santa Barbara, CA 93106-9510, USA

Tables 7; Figures 12; Pages 23

### Table of content

Table S-1: Summary of organosolv treatments

Table S-2: Comparison of isolated lignin from different organosolv treatments

Table S-3: Lignin monomer selectivity and yield (%) from intact high-S poplar biomass with different Pd:Zn ratio

Table S-4: Illustration of lignin monomers selectivity and yield (%) with different types of isolated lignin

Table S-5: Illustration of lignin monomers selectivity and yield (%) with improved reaction condition from OPL, FPL, and H<sub>2</sub>O/HCl lignin

Table S-6: Illustration of lignin monomers selectivity and yield (%) with different catalyst loading and reaction time

Table S-7: Illustration of economic efficiency of converting biomass into DMPPPO

Figure S-1a and b: Aromatic region of 2D (<sup>13</sup>C/<sup>1</sup>H) HSQC NMR of organosolv lignins

Figure S-2: 2D (<sup>13</sup>C/<sup>1</sup>H) HSQC NMR of the aliphatic region for OPL lignin

Figure S-3: GC spectrum of DMPP and DMPPPO derived from high-S lignin

Figure S-4: <sup>1</sup>H NMR of DMPPPO made from DMPP over Nb<sub>2</sub>O<sub>5</sub> catalyst

Figure S-5: ES- mass spectroscopy of DMPPPO made from DMPP over Nb<sub>2</sub>O<sub>5</sub> catalyst

Figure S-6: Illustration of colour on different Nb<sub>2</sub>O<sub>5</sub> samples

Figure S-7: Comparison of XRD analysis between fresh and used Nb<sub>2</sub>O<sub>5</sub>

Figure S-8: SEM image of fresh and used Nb<sub>2</sub>O<sub>5</sub>

Figure S-9: TGA comparison between fresh and used Nb<sub>2</sub>O<sub>5</sub>

Figure S-10: ES+ mass spectroscopy of epoxides made from lignin derived DMPPO

Figure S-11: FT-IR spectra of DMPPO mixture before and after the epoxidation

Figure S-12: TGA analysis of the epoxy thermoset made from DMPPO derived epoxides

References

**Table S-1.** Summary of organosolv treatments

| Method <sup>a</sup>                             | Organosolv Treatment Condition                                                                              |
|-------------------------------------------------|-------------------------------------------------------------------------------------------------------------|
| OPL                                             | 150 g high-S poplar biomass, 1 L methanol, 3 mL HCl (37% w/w), 70 °C, 14 days                               |
| FPL                                             | 9 g high-S poplar biomass, 10 mL formaldehyde, 50 mL p-dioxane, 4.2 mL HCl (37% w/w), 95 °C, 3.5 h          |
| FA/AA                                           | 10 g high-S poplar biomass, FA/AA 70:30 (v/v), heat to boil and hold 2 h                                    |
| H <sub>2</sub> O/HCl                            | 10 g high-S poplar biomass, 40 mL H <sub>2</sub> O, 4 mL HCl (37% w/w), 80 °C, 5 h                          |
| H <sub>2</sub> O/H <sub>2</sub> SO <sub>4</sub> | 10 g high-S poplar biomass, 40 mL H <sub>2</sub> O, 4 mL 37 wt% H <sub>2</sub> SO <sub>4</sub> , 80 °C, 5 h |

<sup>a</sup>Lignin was extracted into liquid phase after each organosolv treatment. The liquid phase was collected by filtration. Then the organosolv lignin precipitated into solid phase after the solvent (or organic solvent) was replaced by water. The solid organosolv lignin was collected by filtration and dried under vacuum for 24 h prior to analysis and reactions.

**Table S-2.** Comparison of isolated lignin from different organosolv treatments

| Entry # | Organosolv treatment                            | Isolated Lignin yield <sup>a</sup> (%) | Heating Duration (h) | M <sub>w</sub> (kg/mol) | M <sub>n</sub> (kg/mol) | G unit (%) | S unit (%) |
|---------|-------------------------------------------------|----------------------------------------|----------------------|-------------------------|-------------------------|------------|------------|
| 1       | Intact high-S poplar                            | n/a <sup>b</sup>                       | -                    | -                       | -                       | 16         | 82         |
| 2       | OPL                                             | 25                                     | 336                  | 3.9                     | 1.1                     | 35         | 62         |
| 3       | FPL                                             | 125 <sup>c</sup>                       | 3.5                  | -                       | -                       | 19         | 80         |
| 4       | FA/AA                                           | 37                                     | 2                    | 2.5                     | 0.5                     | 21         | 79         |
| 5       | H <sub>2</sub> O/HCl                            | 20                                     | 5                    | 1.2                     | 0.4                     | 28         | 72         |
| 6       | H <sub>2</sub> O/H <sub>2</sub> SO <sub>4</sub> | 13                                     | 5                    | 1.6                     | 0.8                     | 33         | 67         |

<sup>a</sup>Isolated lignin yield (%) = [Isolated lignin (g) / Theoretical lignin (g)] x 100%

<sup>b</sup>The lignin content is 22% by weight of the high-S poplar woody biomass. Lignin content in native high-S poplar biomass includes acid soluble lignin and acid insoluble lignin which is determined by standard NREL procedures: NREL/TP-510-42618 and NREL/TP-510-42623.

<sup>c</sup>Due to mass gain from reaction of the protection agent formaldehyde with the lignin framework, the isolated FPL shows weight gain.

**Table S-3.** Lignin monomer selectivity and yield (%) from intact high-S poplar biomass with different Pd:Zn ratio

| Entry # | Pd:Zn ratio | Selectivity (%)  |                   |                     |                      | Total Yield <sup>e</sup> (%) |
|---------|-------------|------------------|-------------------|---------------------|----------------------|------------------------------|
|         |             | DHE <sup>a</sup> | DMPP <sup>b</sup> | DHE-OH <sup>c</sup> | DMPP-OH <sup>d</sup> |                              |
| 1       | 1:0         | -                | 5                 | 21                  | 74                   | 56                           |
| 2       | 1:3         | 12               | 51                | 25                  | 12                   | 51                           |
| 3       | 1:5         | 8                | 69                | 5                   | 18                   | 61                           |
| 4       | 1:10        | 10               | 71                | 6                   | 13                   | 61                           |

<sup>a</sup>DHE selectivity (%) = [DHE (g) / Total monomers (g)] x 100%

<sup>b</sup>DMPP selectivity (%) = [DMPP (g) / Total monomers (g)] x 100%

<sup>c</sup>DHE-OH selectivity (%) = [DHE-OH (g) / Total monomers (g)] x 100%

<sup>d</sup>DMPP-OH selectivity (%) = [DMPP-OH (g) / Total monomers (g)] x 100%

<sup>e</sup> Total yield (%) = [Total monomers (g) / Total lignin substrate (g)] x 100%, Total monomers = DHE + DHE-OH + DMPP + DMPP-OH. In case of using intact poplar biomass, the total lignin substrate was 0.223 g (1 g biomass x 22.3% lignin content).

Reaction condition: 1 g intact high-S poplar biomass, 10 wt% Pd-Zn/C (100 mg) catalyst, 30 mL methanol, 36 bar H<sub>2</sub> (gauge pressure measured at room temperature), 225 °C, 12 hours.

**Table S-4.** Illustration of lignin monomers selectivity and yield (%) with different types of isolated lignin

| Entry # | Isolated Lignin                                 | Selectivity (%)  |                   |                     |                      | Total Yield <sup>e</sup> (%) |
|---------|-------------------------------------------------|------------------|-------------------|---------------------|----------------------|------------------------------|
|         |                                                 | DHE <sup>a</sup> | DMPP <sup>b</sup> | DHE-OH <sup>c</sup> | DMPP-OH <sup>d</sup> |                              |
| 1       | OPL                                             | 15.6             | 56                | 15.6                | 12.8                 | 32                           |
| 2       | FPL                                             | 6                | 26                | 33                  | 35                   | 22.2                         |
| 3       | FA/AA                                           | 8                | 92                | -                   | -                    | 3.6                          |
| 4       | H <sub>2</sub> O/HCl                            | 12               | 49                | 18                  | 21                   | 33                           |
| 5       | H <sub>2</sub> O/H <sub>2</sub> SO <sub>4</sub> | 7                | 93                | -                   | -                    | 9.7                          |

<sup>a</sup>DHE selectivity (%) = [DHE (g) / Total monomers (g)] x 100%

<sup>b</sup>DMPP selectivity (%) = [DMPP (g) / Total monomers (g)] x 100%

<sup>c</sup>DHE-OH selectivity (%) = [DHE-OH (g) / Total monomers (g)] x 100%

<sup>d</sup>DMPP-OH selectivity (%) = [DMPP-OH (g) / Total monomers (g)] x 100%

<sup>e</sup> Total yield (%) = [Total monomers (g) / Total lignin substrate (g)] x 100%, Total monomers = DHE + DHE-OH + DMPP + DMPP-OH.

Reaction condition: 500 mg lignin substrate, 10 wt% Pd-Zn/C (Pd:Zn 1:10) catalyst, 30 mL methanol, 36 bar H<sub>2</sub> (gauge pressure measured at room temperature), 225 °C, 12 hours.

**Table S-5.** Illustration of lignin monomers selectivity and yield (%) with improved reaction condition from OPL, FPL, and H<sub>2</sub>O/HCl lignin.

| Entry # | Isolated Lignin                   | Selectivity (%)  |                   |                     |                      | Total Yield <sup>e</sup> (%) |
|---------|-----------------------------------|------------------|-------------------|---------------------|----------------------|------------------------------|
|         |                                   | DHE <sup>a</sup> | DMPP <sup>b</sup> | DHE-OH <sup>c</sup> | DMPP-OH <sup>d</sup> |                              |
| 1       | OPL <sup>f</sup>                  | 9                | 36                | 24                  | 31                   | 50                           |
| 2       | FPL <sup>f</sup>                  | 4                | 26                | 28                  | 42                   | 35                           |
| 3       | H <sub>2</sub> O/HCl <sup>f</sup> | 2                | 18                | 32                  | 48                   | 45                           |

<sup>a</sup>DHE selectivity (%) = [DHE (g) / Total monomers (g)] x 100%

<sup>b</sup>DMPP selectivity (%) = [DMPP (g) / Total monomers (g)] x 100%

<sup>c</sup>DHE-OH selectivity (%) = [DHE-OH (g) / Total monomers (g)] x 100%

<sup>d</sup>DMPP-OH selectivity (%) = [DMPP-OH (g) / Total monomers (g)] x 100%

<sup>e</sup> Total yield (%) = [Total monomers (g) / Total lignin substrate (g)] x 100%, Total monomers = DHE + DHE-OH + DMPP + DMPP-OH.

<sup>f</sup> Entries with 30 wt% of Pd-Zn/C (Pd:Zn = 1:10) catalyst loading

Reaction condition: 500 mg lignin substrate, Pd-Zn/C, catalyst, 30 mL methanol, 36 bar H<sub>2</sub> (gauge pressure measured at room temperature), 225 °C, 12 h.

**Table S-6.** Illustration of lignin monomers selectivity and yield (%) with different catalyst loading and reaction time

| Entry # | Isolated Lignin                   | Selectivity (%)  |                   |                     |                      | Total Yield <sup>e</sup> (%) |
|---------|-----------------------------------|------------------|-------------------|---------------------|----------------------|------------------------------|
|         |                                   | DHE <sup>a</sup> | DMPP <sup>b</sup> | DHE-OH <sup>c</sup> | DMPP-OH <sup>d</sup> |                              |
| 1       | OPL <sup>f</sup>                  | 16.5             | 53                | 12.5                | 18                   | 39.5                         |
| 2       | OPL <sup>f-18</sup>               | 9                | 40                | 22                  | 29                   | 48                           |
| 3       | OPL <sup>g-18</sup>               | 5                | 36.5              | 24                  | 31                   | 50                           |
| 4       | FPL <sup>f</sup>                  | 3.5              | 26                | 26                  | 44.5                 | 31                           |
| 5       | H <sub>2</sub> O/HCl <sup>f</sup> | 8                | 33                | 29.5                | 29.5                 | 43                           |

<sup>a</sup>DHE selectivity (%) = [DHE (g) / Total monomers (g)] x 100%

<sup>b</sup>DMPP selectivity (%) = [DMPP (g) / Total monomers (g)] x 100%

<sup>c</sup>DHE-OH selectivity (%) = [DHE-OH (g) / Total monomers (g)] x 100%

<sup>d</sup>DMPP-OH selectivity (%) = [DMPP-OH (g) / Total monomers (g)] x 100%

<sup>e</sup> Total yield (%) = [Total monomers (g) / Total lignin substrate (g)] x 100%, Total monomers = DHE + DHE-OH + DMPP + DMPP-OH.

<sup>f</sup> Entries with 20 wt% of Pd-Zn/C (Pd:Zn = 1:10) catalyst loading, <sup>f-18</sup> indicates entry with 20 wt% catalyst but 18h reactions.

<sup>g-18</sup> indicates the entry with 30 wt% catalyst but 18h reactions.

Reaction condition: 500 mg lignin substrate, Pd-Zn/C (Pd:Zn 1:10) catalyst, 30 mL methanol, 36 bar H<sub>2</sub> (gauge pressure measured at room temperature), 225 °C, 12 h.



**Table S-7.** Illustration of economic efficiency of converting 2300 kilo ton poplar biomass into DMPPPO to displace BPA market

|        |                         |                        |                          |
|--------|-------------------------|------------------------|--------------------------|
|        | <b>Plantation yield</b> | <b>Land occupation</b> | <b>Agricultural cost</b> |
| Input  | 7 dry ton/acre          | 1% of Iowa state       | \$58 – 138 million       |
|        | <b>DMPPPO yield</b>     | <b>Market size</b>     | <b>Product value</b>     |
| Output | 300 kilo ton            | 3.75% of BPA market    | \$600 million            |

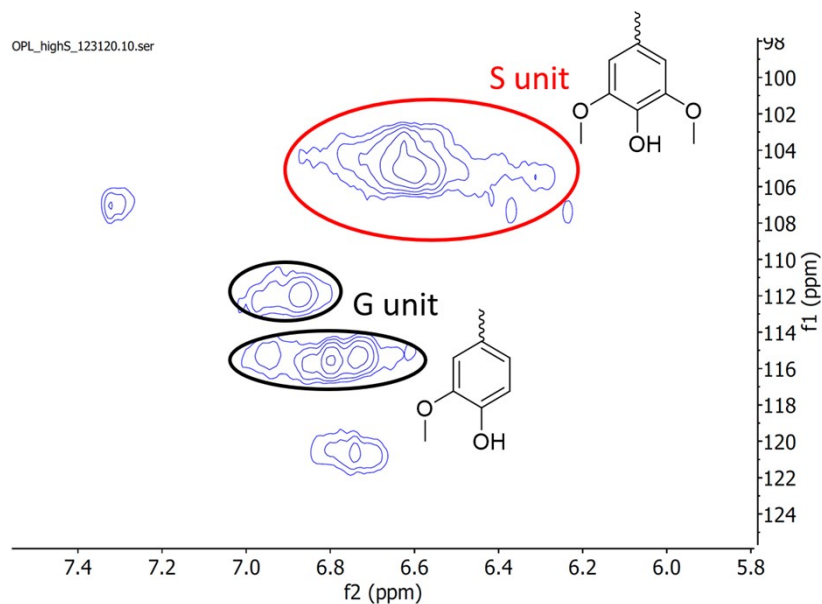

**Figure S-1-a.** 2D HSQC NMR of the aromatic region on OPL lignin.

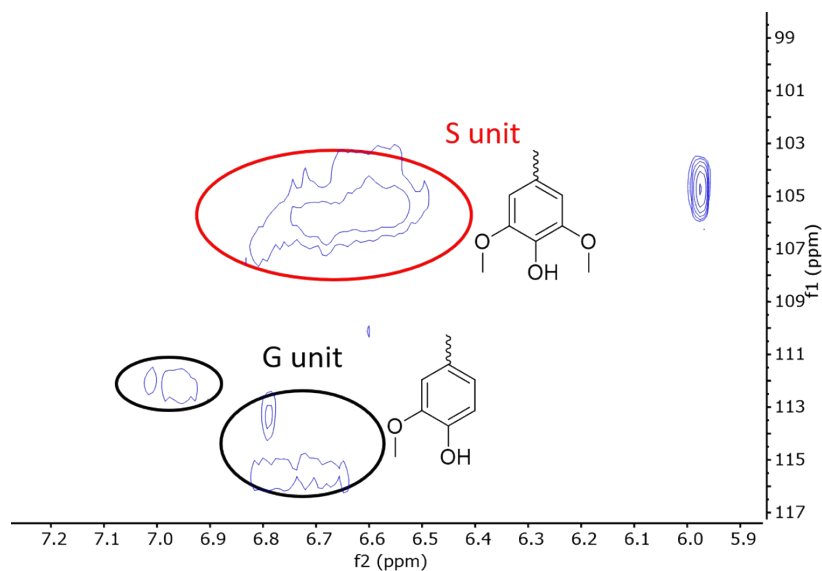

**Figure S-1-b.** 2D HSQC NMR of the aromatic region on FPL lignin.

Figures S-1-a and S-1-b illustrate the aromatic region of 2D HSQC NMR of OPL and FPL lignins which indicate the specific carbon-proton correlations of G and S units. The content of each lignin unit was calculated according to a method described on literature which uses the integration of the contour signals of the G and S units.<sup>1</sup> For instance, the percentage of G and S

content X% can be calculated as:  $X\% = X / (S_{2/6} + S'_{2/6} + G_2 + G_5 + G_6)$ , where  $X = S_{2/6} + S'_{2/6}$  when calculating the S unit content, while  $X = G_2 + G_5 + G_6$  for G unit. The carbon-proton ( $^{13}\text{C}/^1\text{H}$ ) correlations were assigned according to literature.<sup>2</sup> By which,  $S_{2/6}$ : 103.0-104.0 ppm/6.6-6.8 ppm,  $S'_{2/6}$ : 105.0-106.0 ppm/7.3-7.4 ppm,  $G_2$ : 110.0-111.0 ppm/7.0-7.1 ppm,  $G_5$ : 114.0-115.0 ppm/6.7-6.9 ppm, and  $G_6$ : 118.0-119.0 ppm/6.8-6.9 ppm.

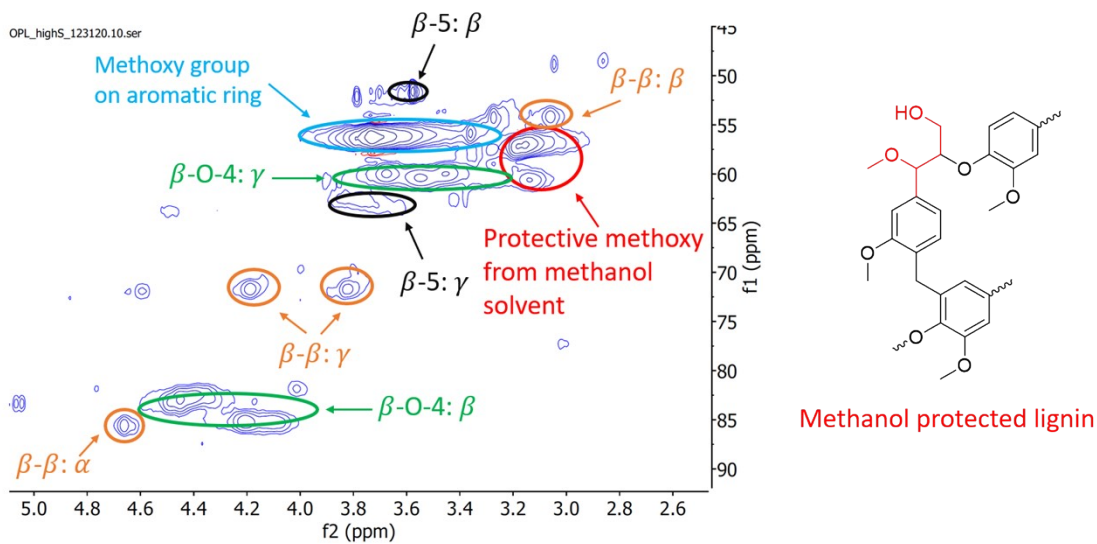

**Figure S-2.** 2D HSQC NMR of the aliphatic region for OPL lignin

Figure S-2 illustrates the 2D HSQC NMR detection of the aliphatic region on OPL lignin. By which, the protective methoxy group attached to the lignin structure was observed (labeled in red). The source of additional methoxy group was the methanol solvent which was used for lignin extraction during OPL organosolv treatment.

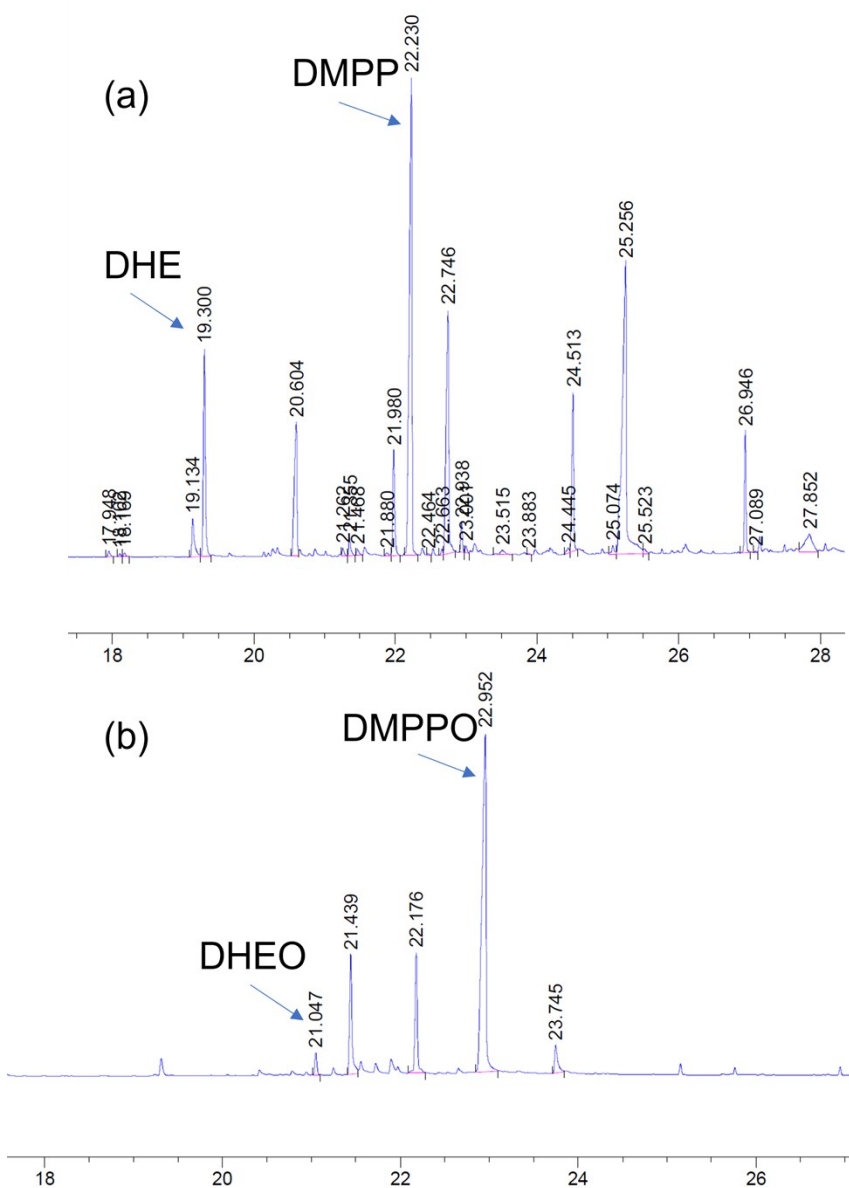

**Figure S-3.** GC-FID spectrum of (a) DMPP oil obtained from lignin depolymerization reaction and (b) DMPPO product made from the DMPP oil display in spectrum Figure S-3 (a) over Nb<sub>2</sub>O<sub>5</sub> catalyst.

Figure S-3 (a) displays the GC-FID result of DMPP (22.230 min) oil derived from high-S poplar lignin which shows the peak of DMPP as the major product and many other GC peaks as by-products and unidentified species. The commercial clean standard DMPP is transparent with slightly yellow coloured oil. However, the DMPP oil made from lignin depolymerizations was in dark brown colour. This phenomenon also indicates the DMPP oil in (a) was impure. Similarly, the DMPPO made from such dark brown DMPP oil also contained by-products and impurities as displayed in (b). This result suggests our Nb<sub>2</sub>O<sub>5</sub> catalyst was tolerant to the by-products and impurities which still converted DMPP in the dark brown oil into DMPPO. However, the GC

peaks (Figure S-3 (b)) of by-products and impurities were reduced in the DMPPPO product after the  $\text{Nb}_2\text{O}_5$  reaction. This could be because the by-products and impurities were adsorbed to the  $\text{Nb}_2\text{O}_5$  and caused the catalyst to have a colour change from white (fresh  $\text{Nb}_2\text{O}_5$ ) to grayish brown (used  $\text{Nb}_2\text{O}_5$ ). By which, this change to the  $\text{Nb}_2\text{O}_5$  may also cause the deactivation after the third run of recycling test (Figure 7).

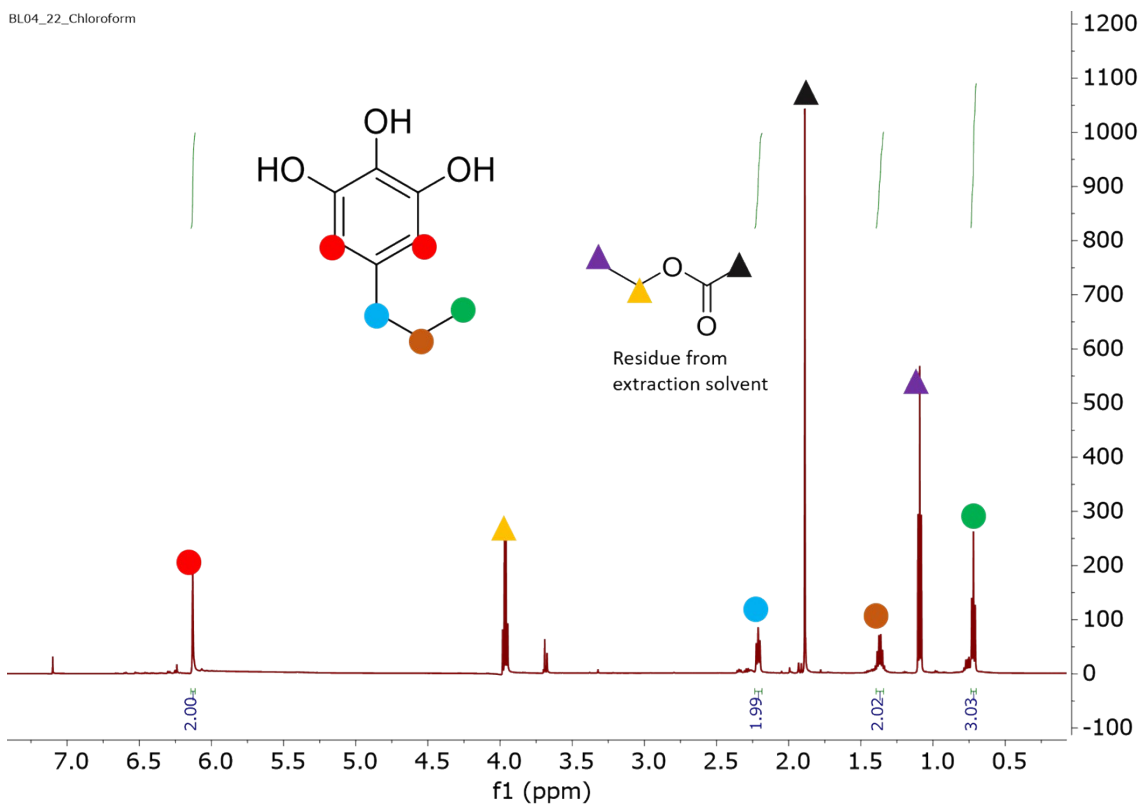

**Figure S-4.**  $^1\text{H}$  NMR of DMPPO obtained from the  $\text{Nb}_2\text{O}_5$  catalyzed reaction mixture.

Figure S-4 illustrates the proton signal of DMPPO molecule made from DMPP over  $\text{Nb}_2\text{O}_5$  catalyst. The assignment of proton signals on spectrum by DMPPO was labeled with the colored circles. The signals labeled with triangles were due to the ethyl acetate residue because the DMPPO was produced in reaction water medium and after reaction it was extracted by ethyl acetate into organic layer and thus some ethyl acetate remained with DMPPO after product extraction.

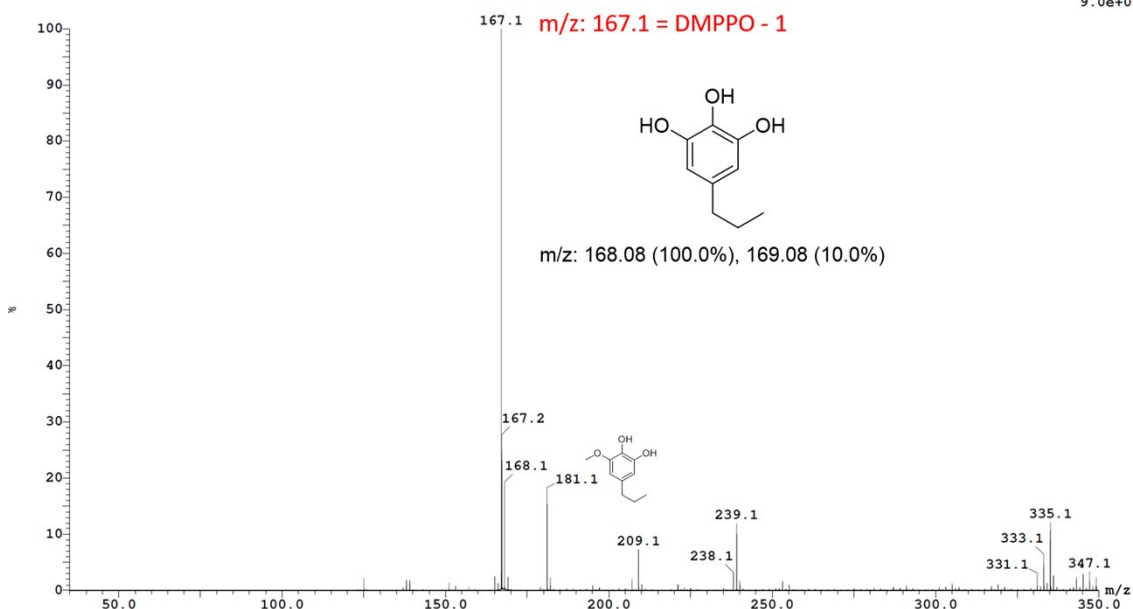

**Figure S-5.** ES- mass spectroscopy of DMPPO obtained from the Nb<sub>2</sub>O<sub>5</sub> catalyzed reaction mixture.

ES- mass spectroscopy was also used to confirm the production of DMPPO. According to the chemical structure of DMPPO which contains three phenolic hydroxyl groups, ES- mass spectroscopy was selectively performed for the detection. The DMPPO was ionized in the negative ion mode by giving off a proton and the detected mass of DMPPO was the molecular weight of DMPPO – 1. The molecular weight of DMPPO is 168.08 g/mol, and thus the detected 167.1 m/z on the spectrum indicates the presence of DMPPO. On the other hand, the by-product MeO-DHEO which molecular weight is 182.08 was also observed on the ES- detection at the detected m/z of 181.1. The other small signals such as 209.1, 239.1, and 335.1 were from the instrument background.



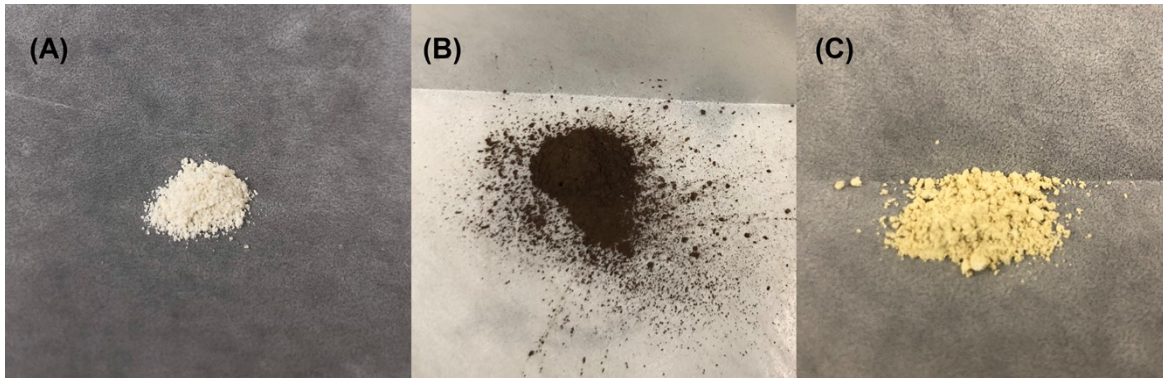

**Figure S-6.** Illustration of colour on (A) fresh  $\text{Nb}_2\text{O}_5$ , (B) used  $\text{Nb}_2\text{O}_5$  after 3<sup>rd</sup> recycle reaction, and (C) the regenerated  $\text{Nb}_2\text{O}_5$  after calcination at 450 °C.

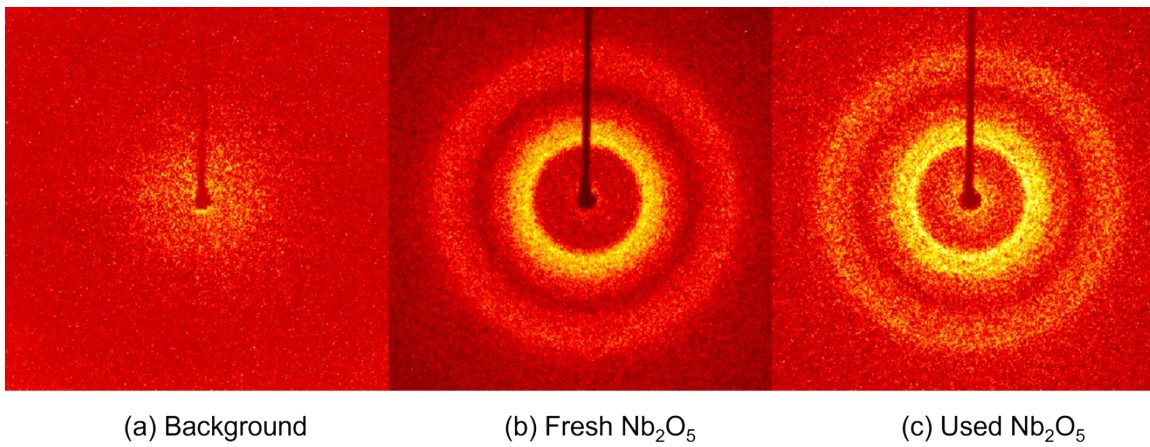

**Figure S-7.** Comparison of XRD between (a) background, (b) fresh  $\text{Nb}_2\text{O}_5$ , and (c) Used  $\text{Nb}_2\text{O}_5$ . The Used  $\text{Nb}_2\text{O}_5$  was obtained after the 3<sup>rd</sup> recycle reaction.

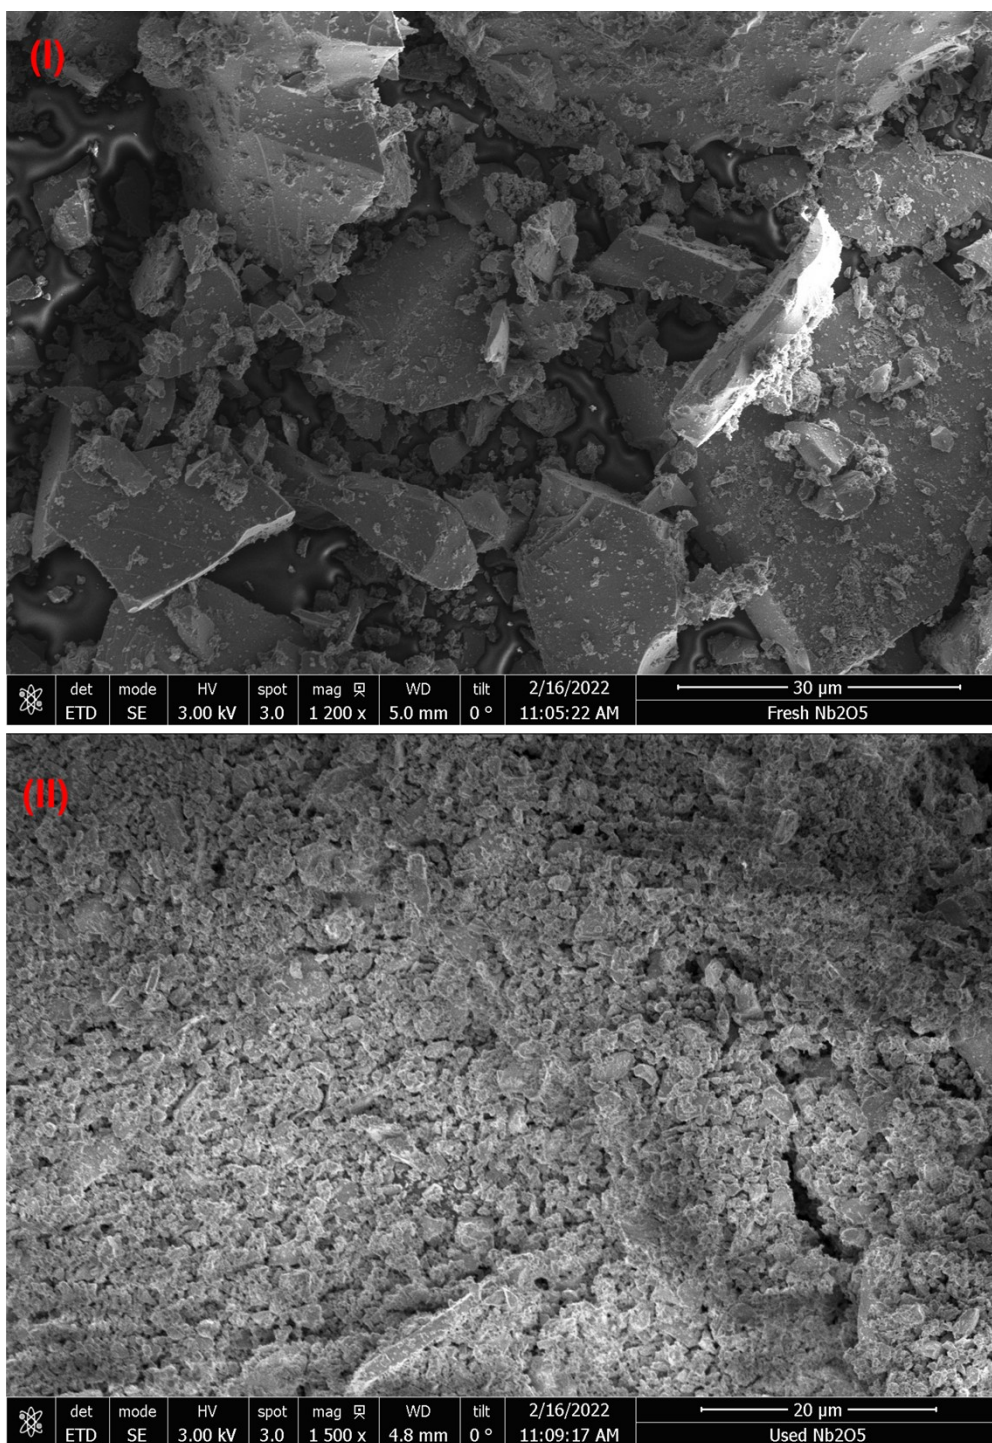

Figure S-8. SEM of (I) fresh Nb<sub>2</sub>O<sub>5</sub> and (II) used Nb<sub>2</sub>O<sub>5</sub>. The Used Nb<sub>2</sub>O<sub>5</sub> was obtained after the 3<sup>rd</sup> recycle reaction.

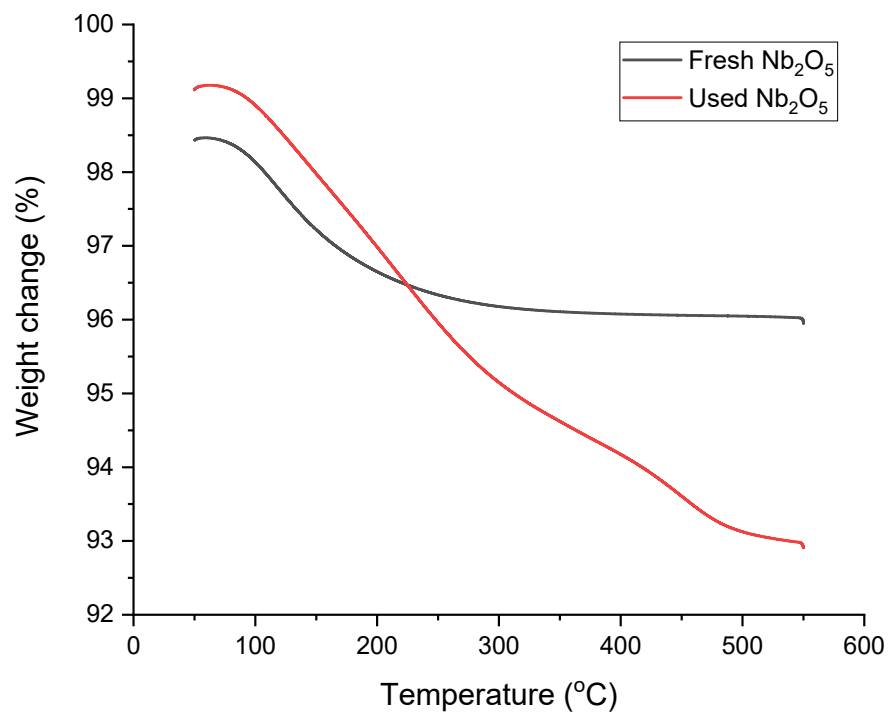

**Figure S-9.** Comparison between fresh Nb<sub>2</sub>O<sub>5</sub> and used Nb<sub>2</sub>O<sub>5</sub> by TGA analysis. The Used Nb<sub>2</sub>O<sub>5</sub> was obtained after the 3<sup>rd</sup> recycle reaction.

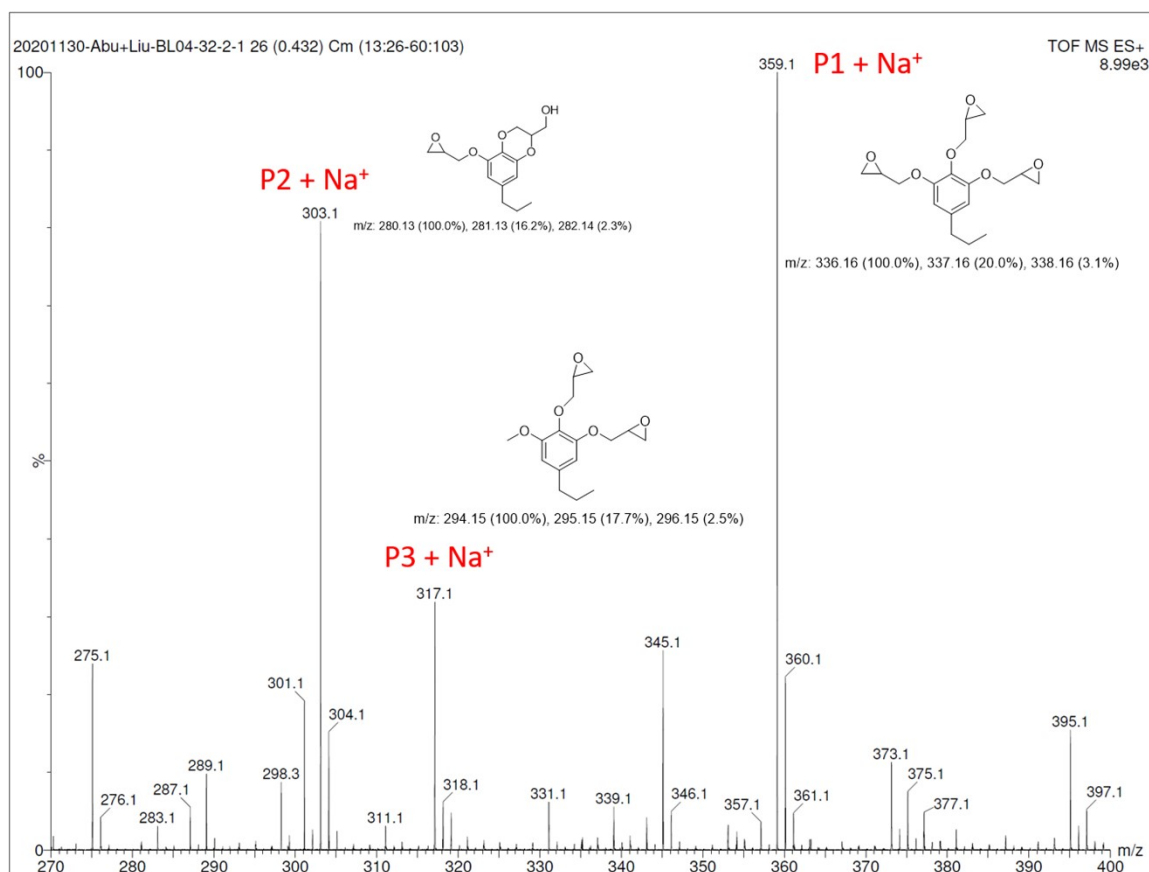

**Figure S-10.** ES+ mass spectroscopy of epoxides made from the lignin derived DMPPPO.

ES+ mass spectroscopy was used for the detection of epoxides made from lignin derived DMPPPO. Due to the chemical structures of the epoxides, they are hardly ionized in the negative ionization mode. Therefore, the positively charged adducts were added to the epoxide molecules during the measurement. The detection in Figure S-5 shows the mass spectroscopy detection of the epoxides with sodium ion adducts (Na<sup>+</sup>) which the detected m/Z was the molecular weight of epoxide + 23. P1 is the tri-epoxides made from DMPPPO which has molecular weight 336.16 g/mol and thus the 359.1 signal indicated the formation of P1. Similarly, the detected m/Z of 303.1 represented the byproduct P2 formed during the reaction of DMPPPO with epichlorohydrin. According to the literature, the product distribution between the epoxides (P1) and ring-opening byproduct (P2) was around 1:1.<sup>3</sup> Thus the detection of P2 was also significant on ES+ mass spectroscopy. The di-epoxides product P3 was also observed at the detected m/Z of 317.1. The formation of P3 was because the byproduct MeO-DHEO made from DMPP over Nb<sub>2</sub>O<sub>5</sub> and further reacted with epichlorohydrin.



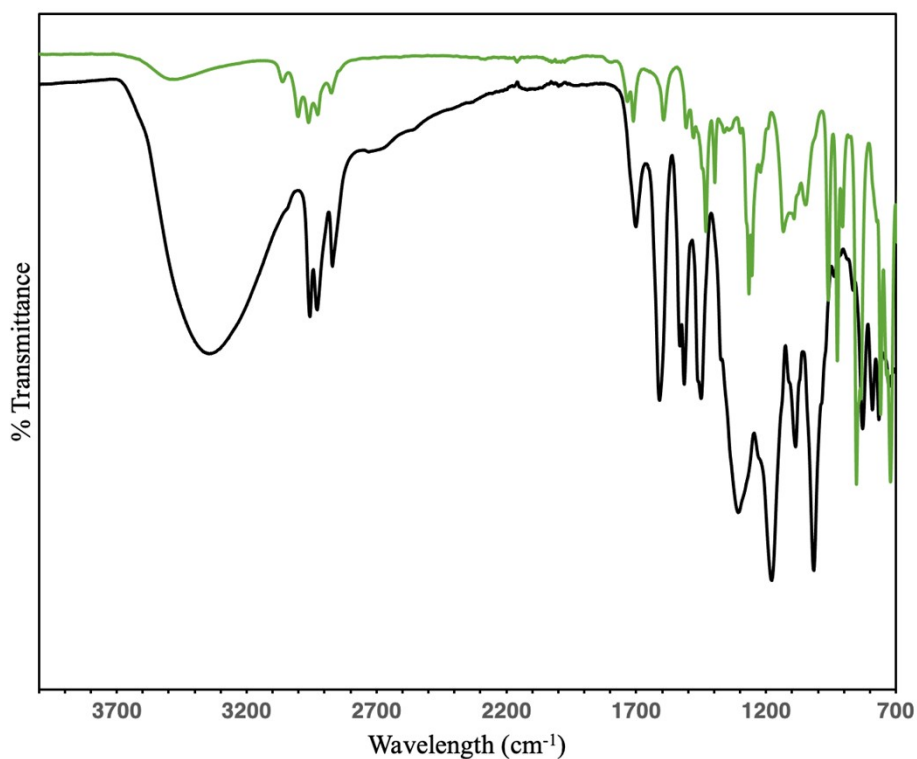

**Figure S-11.** FT-IR spectra of DMPPO mixture (black coloured) and epoxy monomers (green coloured).

Before epoxidation of the DMPPO mixture, peaks appear at around  $3331\text{ cm}^{-1}$  for O-H stretching,  $2867$ ,  $2950$  and  $2957\text{ cm}^{-1}$  for alkyl C-H stretch, and  $1610$ ,  $1515$  and  $1448\text{ cm}^{-1}$  aromatic C-C bond. After the epoxidation of the phenols with epichlorohydrin, an epoxy ring band at  $927\text{ cm}^{-1}$  and a C-O-C ether linkage at  $1015\text{ cm}^{-1}$  are observed. The O-H bands of the glycidyl ethers significantly decreased after epoxidation, indicating the hydroxyl groups are consumed but with some benzodioxane side product O-H present.

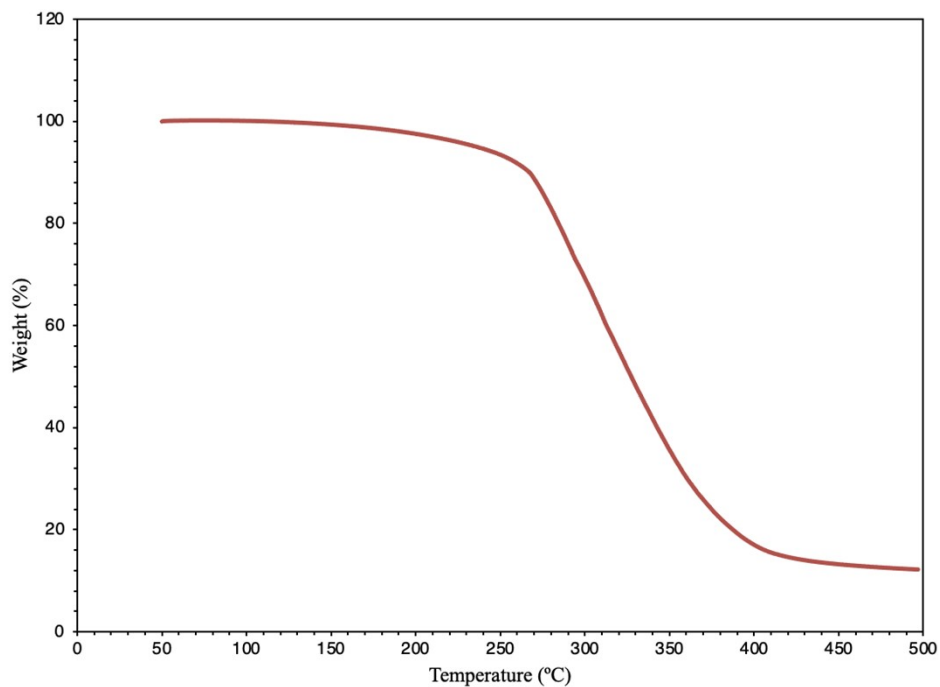

**Figure S-12.** TGA analysis thermogram of DMPPPO based epoxy network as a function of temperature.

Thermogravimetric analysis (TGA) thermograms show a one-step degradation profile, which is attributed to the decomposition of cross-linked polymer network. The onset degradation temperature ( $T_{d5}$ , temperature at 5% weight loss) was 252 °C.

## References

1. Cheng, C. B.; Truong, J.; Barrett, J. A.; Shen, D. K.; Abu-Omar, M. M.; Ford, P. C., Hydrogenolysis of Organosolv Lignin in Ethanol/Isopropanol Media without Added Transition-Metal Catalyst. *Acs Sustain Chem Eng* **2020**, *8* (2), 1023-1030.
2. Luo, H.; Abu-Omar, M. M., Lignin extraction and catalytic upgrading from genetically modified poplar. *Green Chem* **2018**, *20* (3), 745-753.
3. Zhao, S.; Abu-Omar, M. M., Biobased Epoxy Nanocomposites Derived from Lignin-Based Monomers. *Biomacromolecules* **2015**, *16* (7), 2025-2031.
